# Supplementary material for: Multiple Origins of the Pathogenic Yeast Candida orthopsilosis by Separate Hybridizations between Two Parental Species
Source: PubMed Central journal article supplement (PMC5091853; doi:10.1371/journal.pgen.1006404), 2016-11-02
Supplement: pgen.1006404.s002.pdf [file pgen.1006404.s002.pdf]

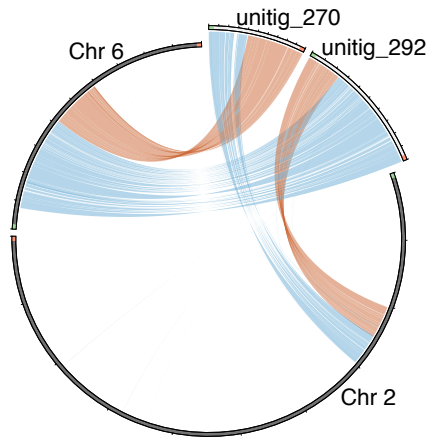

**S1 Fig.** Assembly error in *C. orthopsilosis* 90-125.
