# Supplementary material for: Multiple Origins of the Pathogenic Yeast Candida orthopsilosis by Separate Hybridizations between Two Parental Species
Source: PubMed Central journal article supplement (PMC5091853; doi:10.1371/journal.pgen.1006404), 2016-11-02
Supplement: pgen.1006404.s004.pdf [file pgen.1006404.s004.pdf]

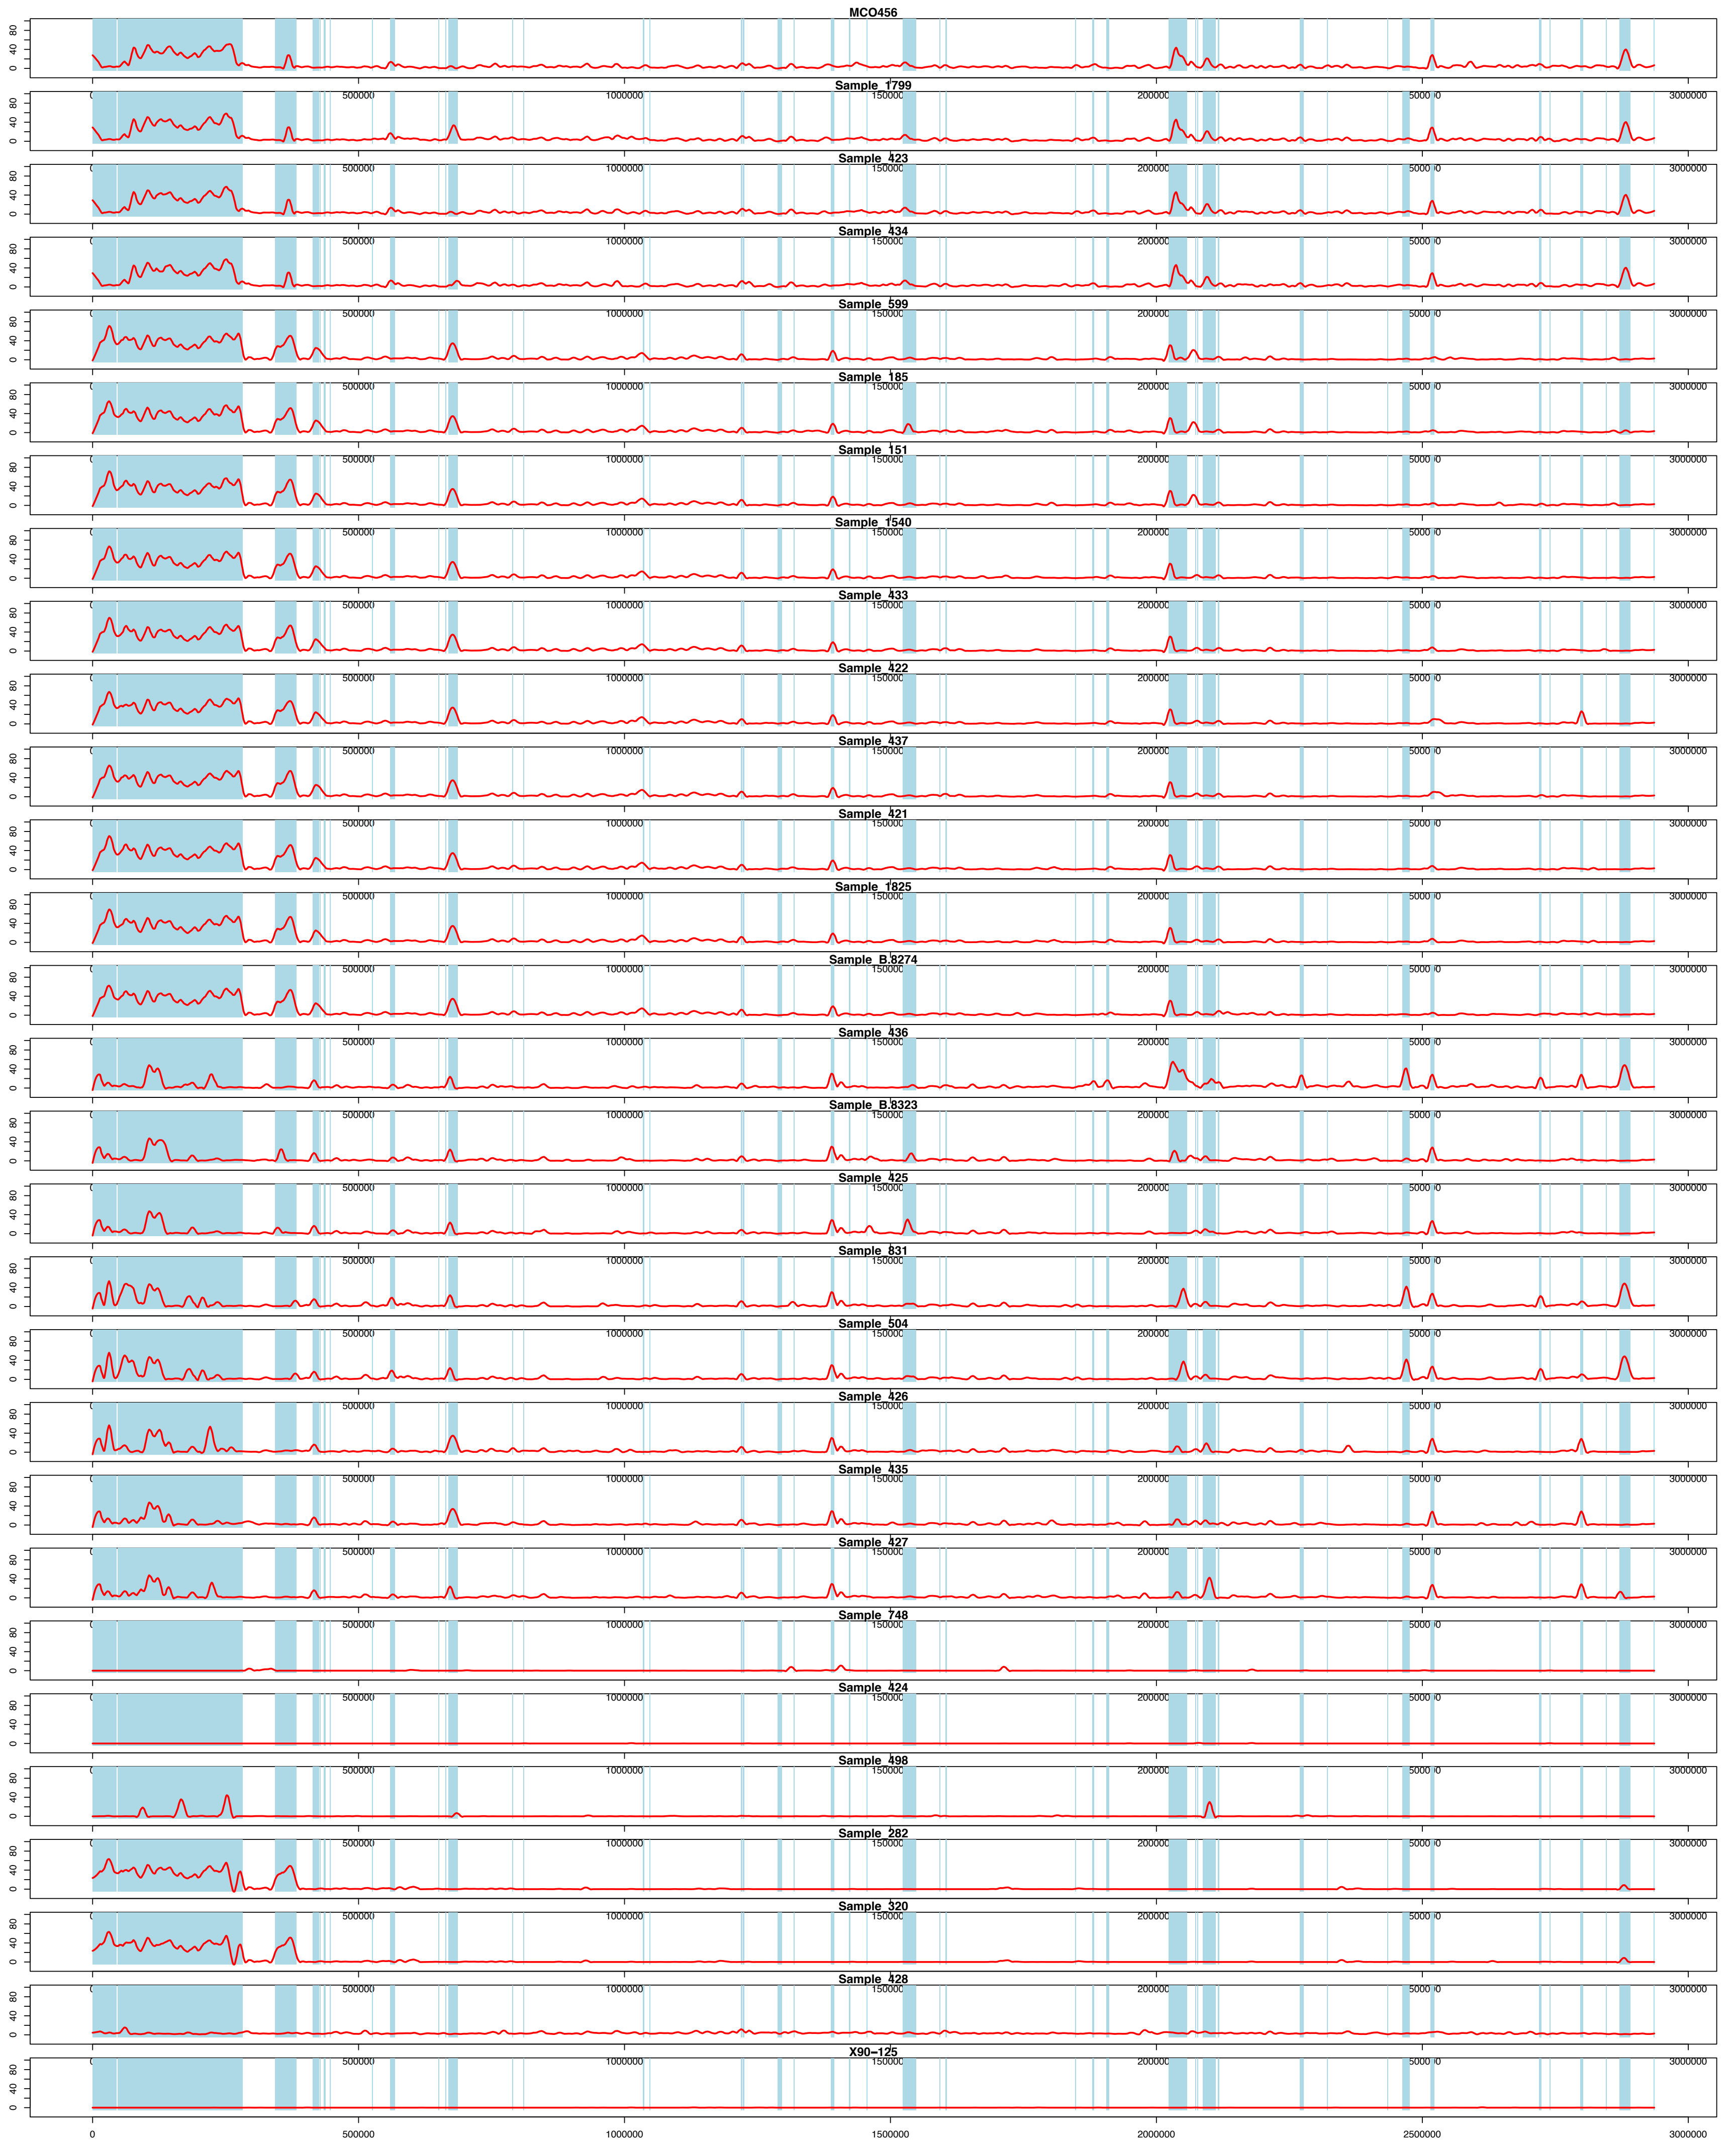

Chromosome 2

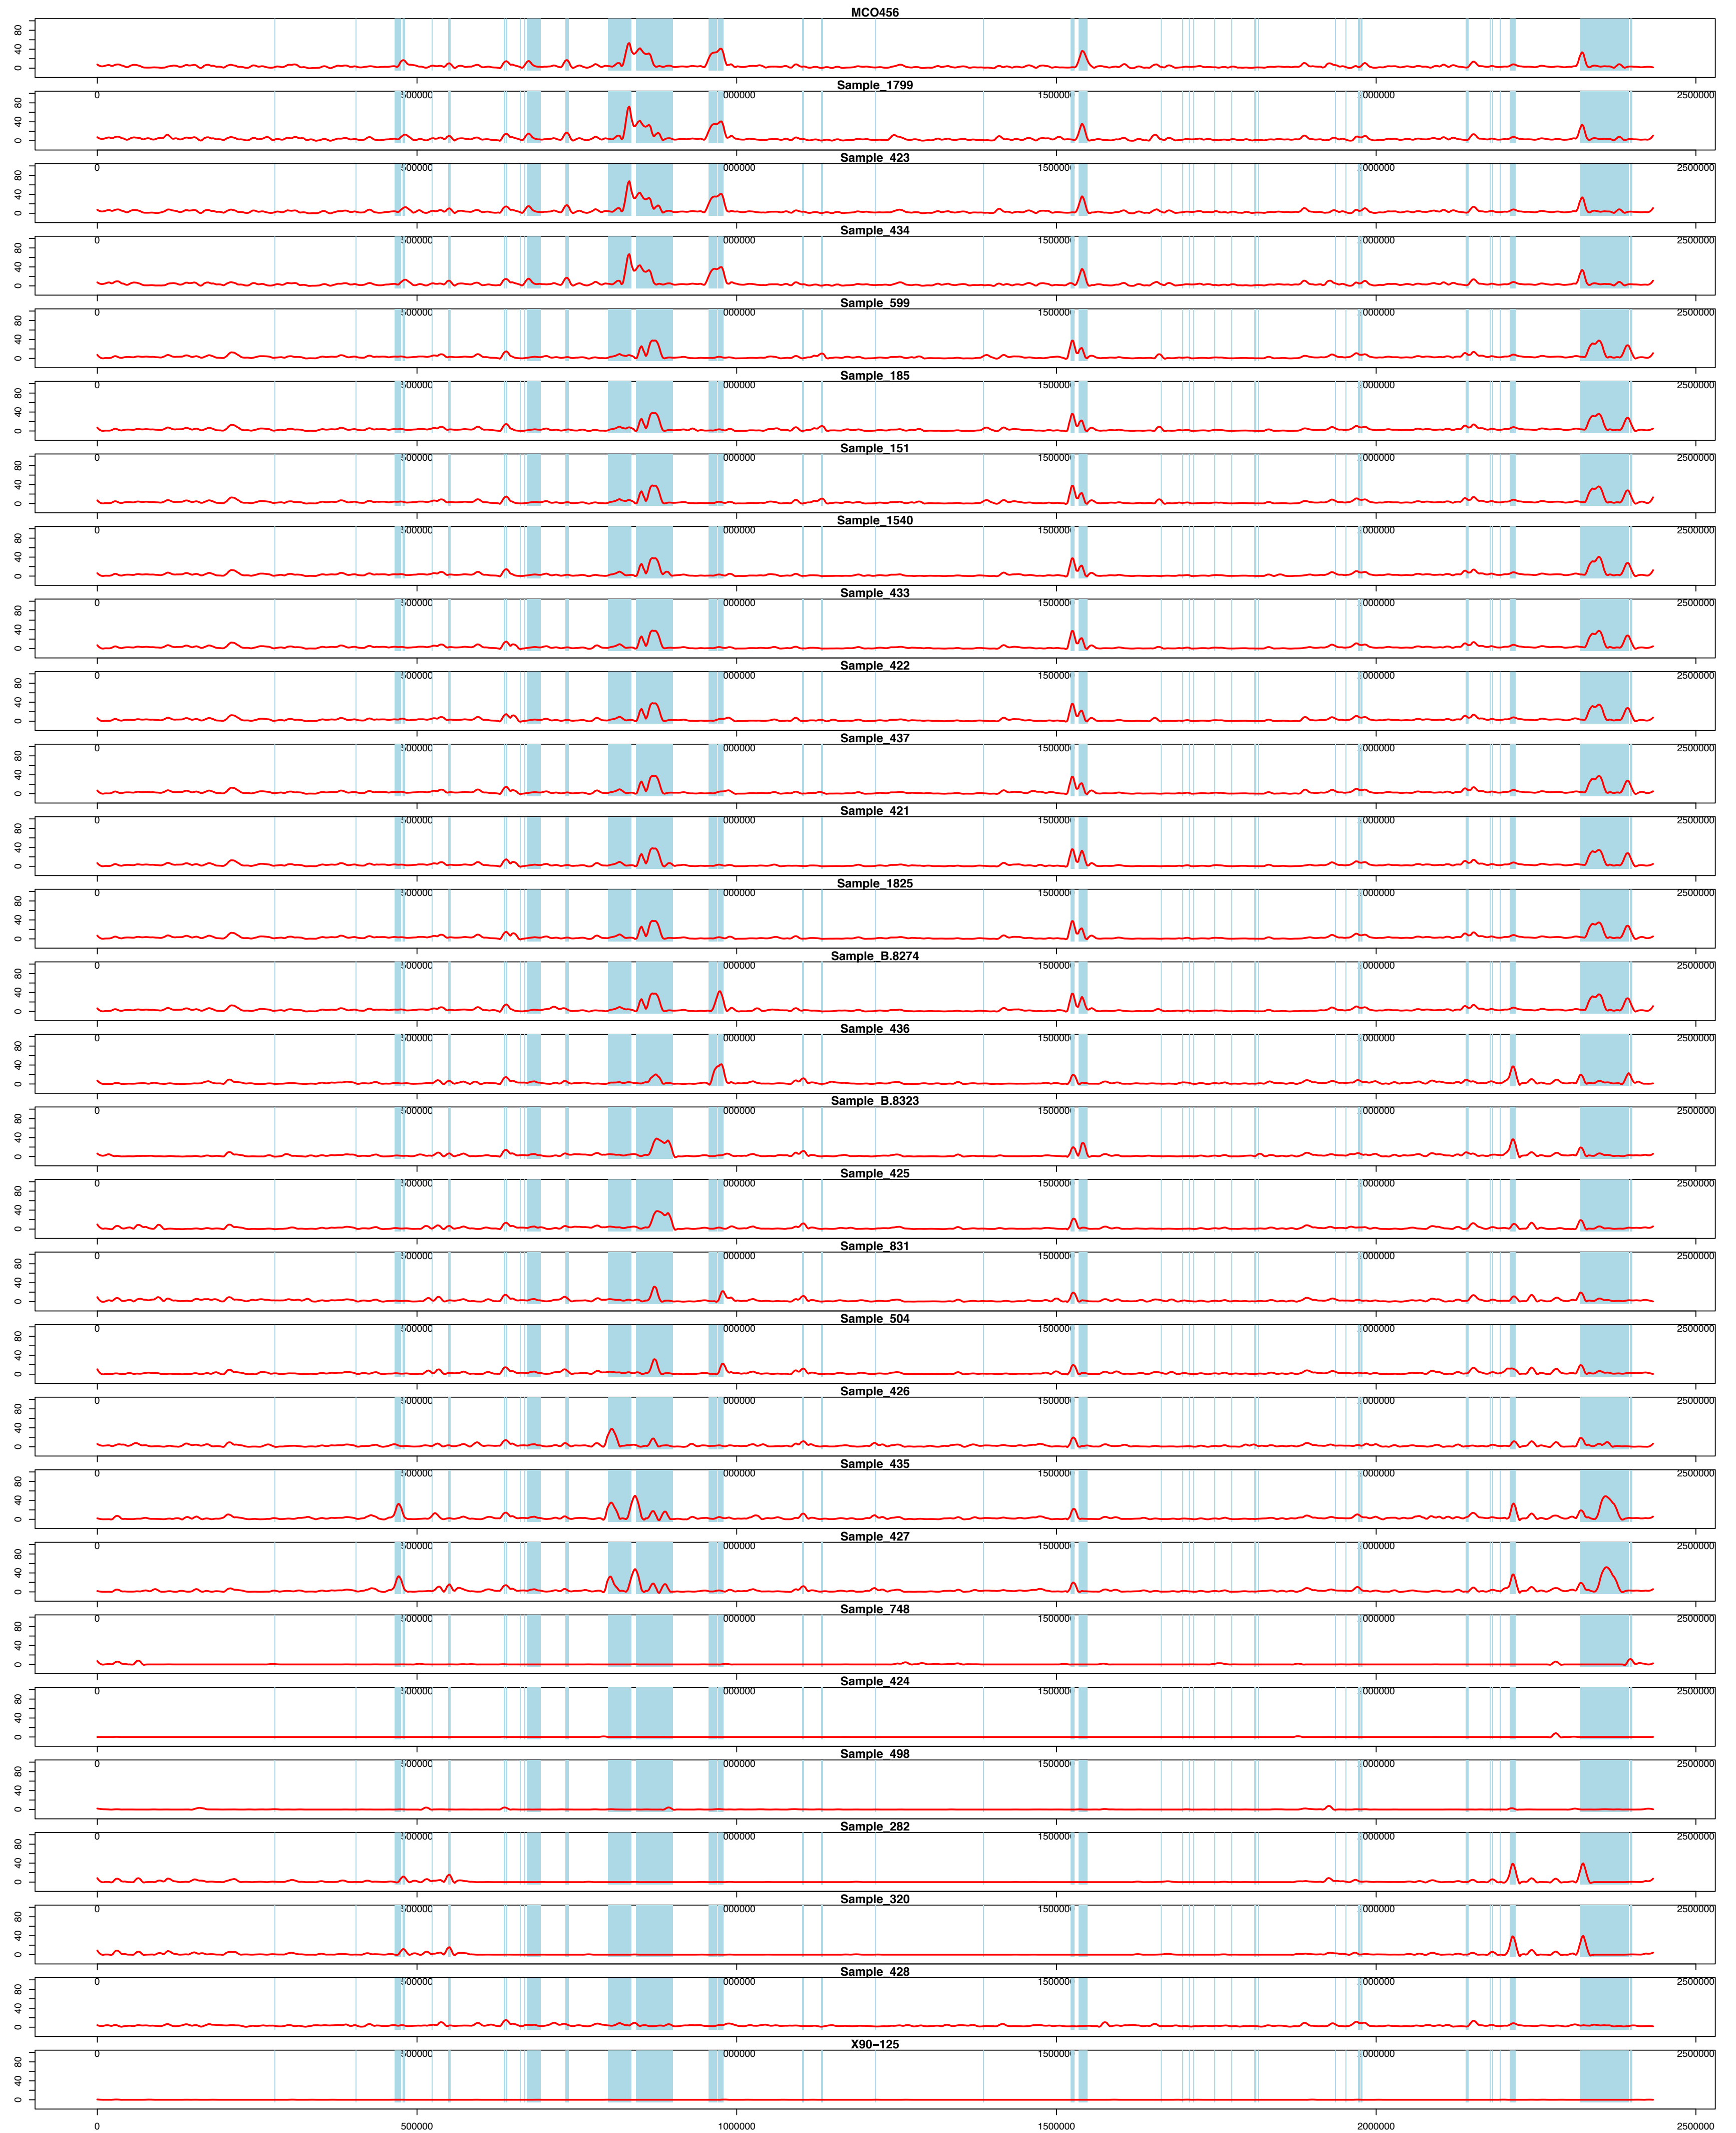

Chromosome 3

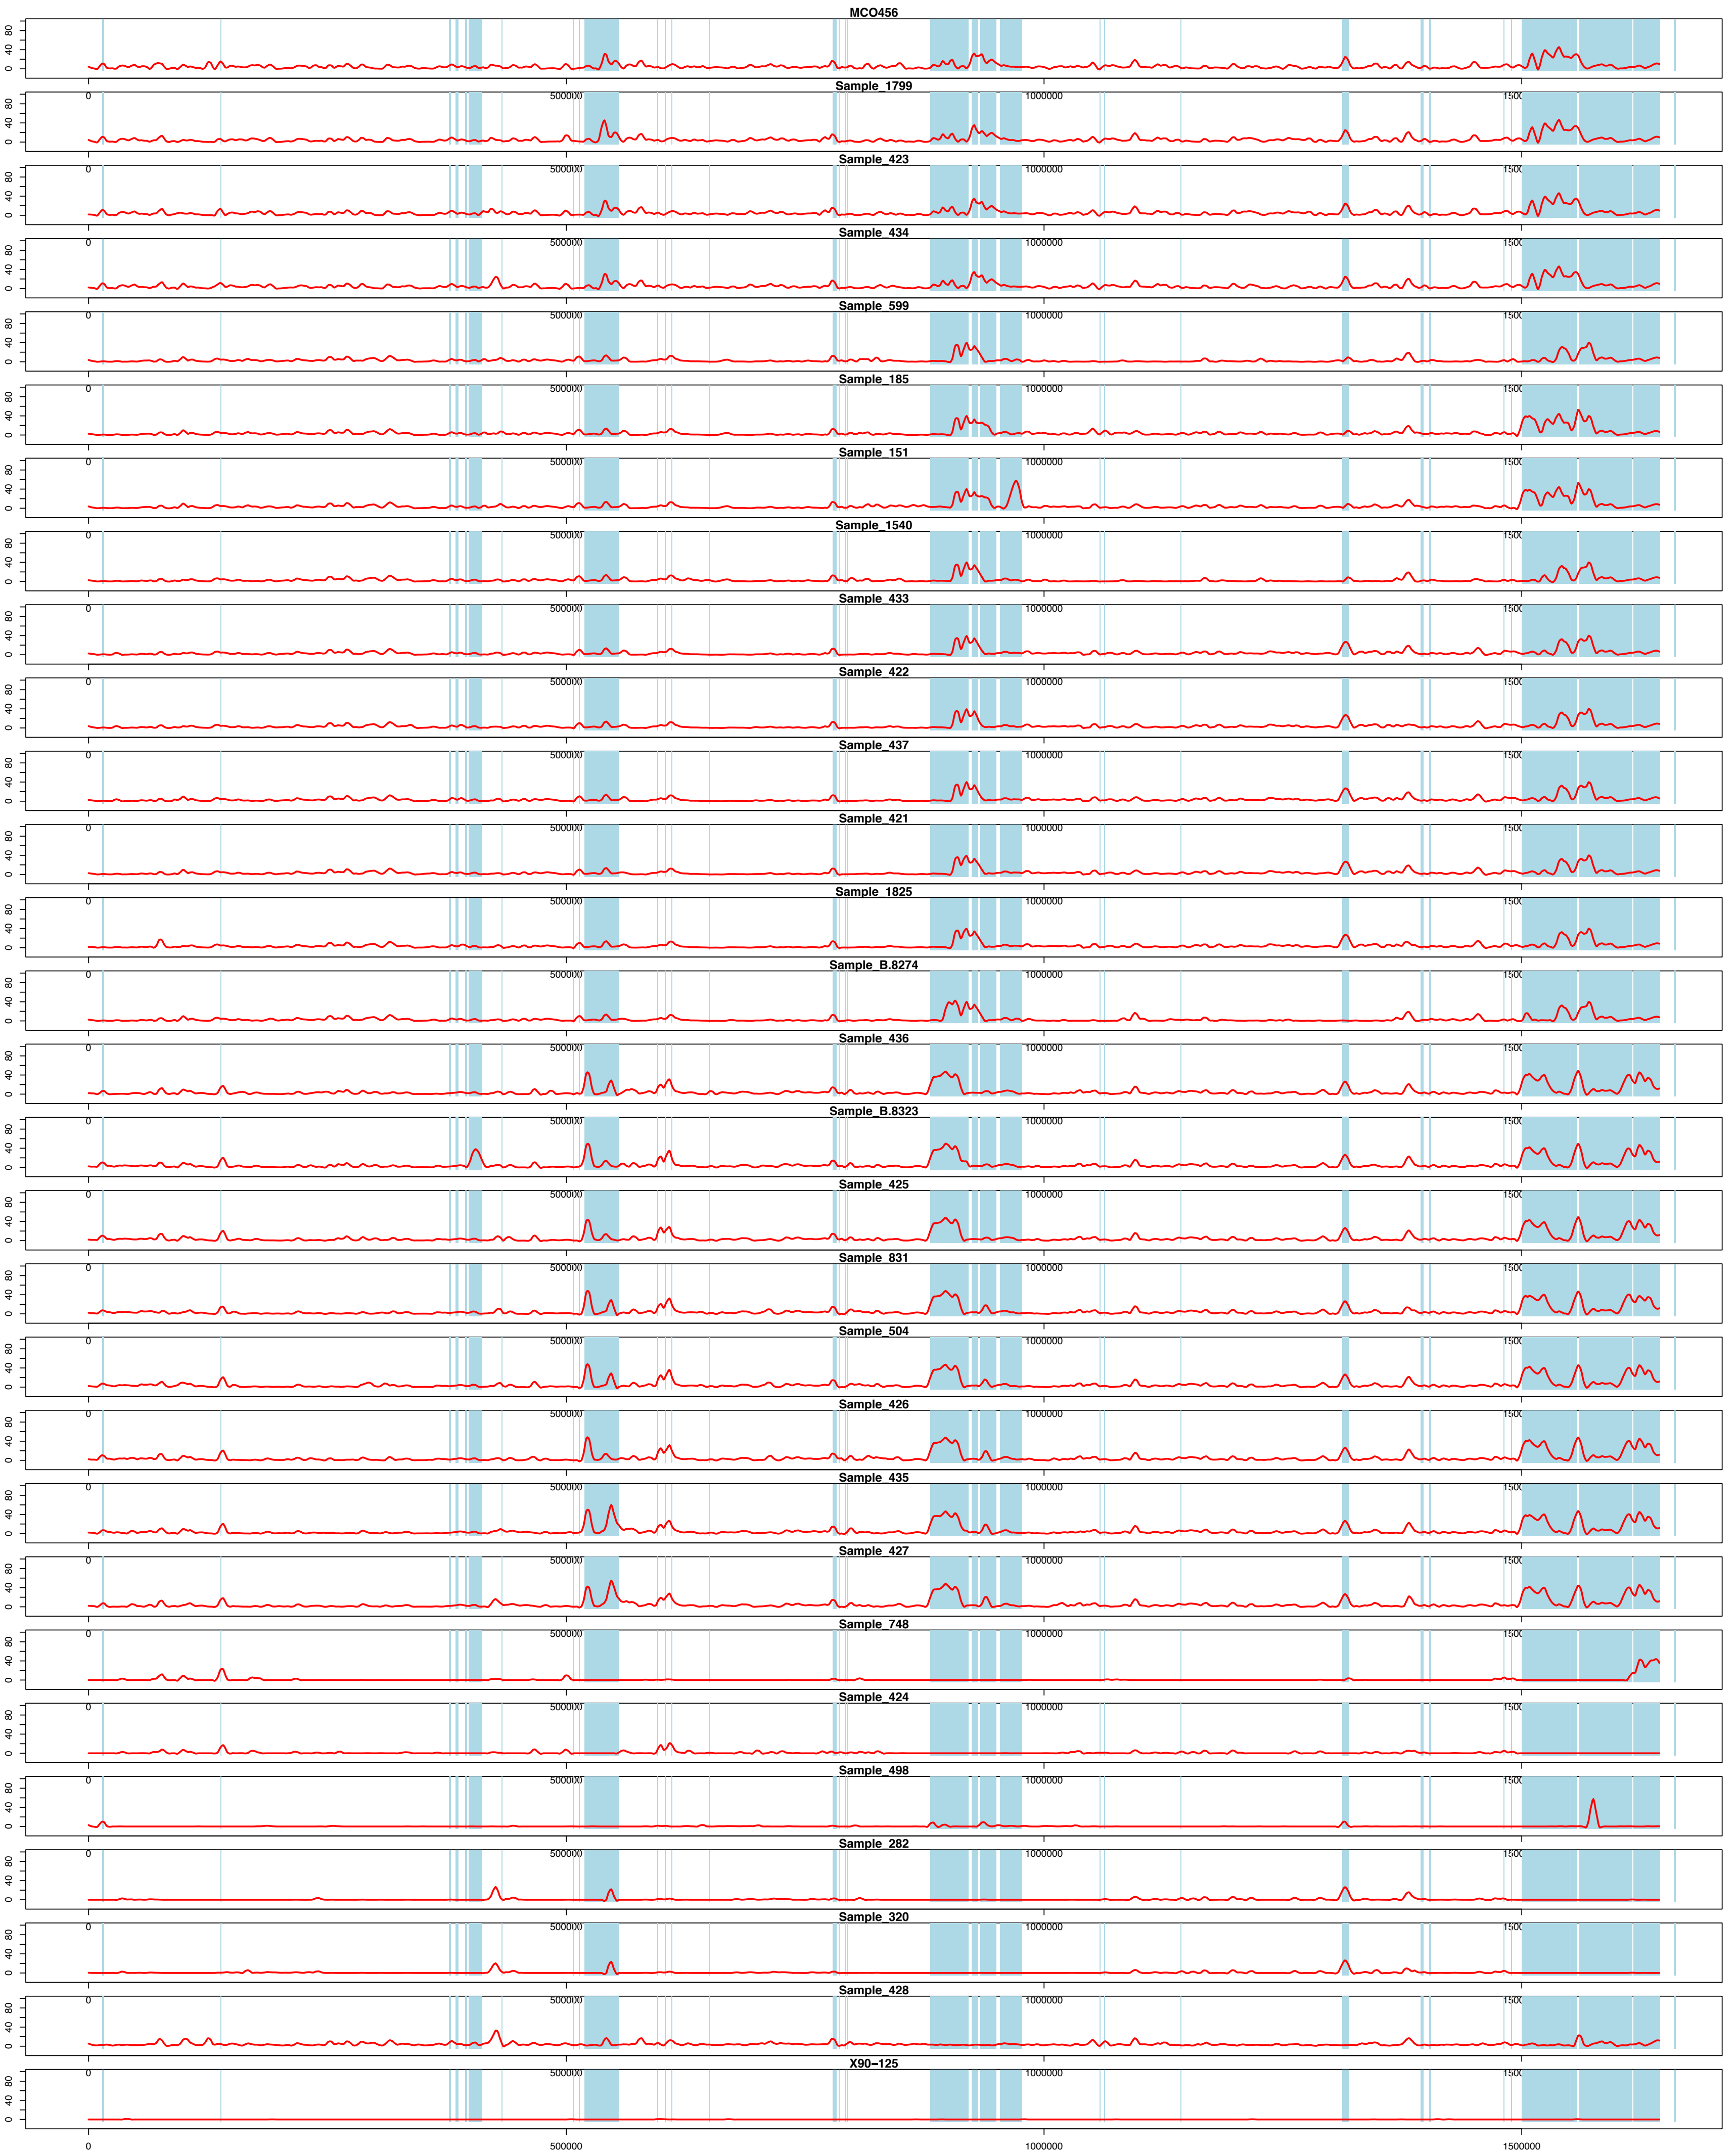



Chromosome 4

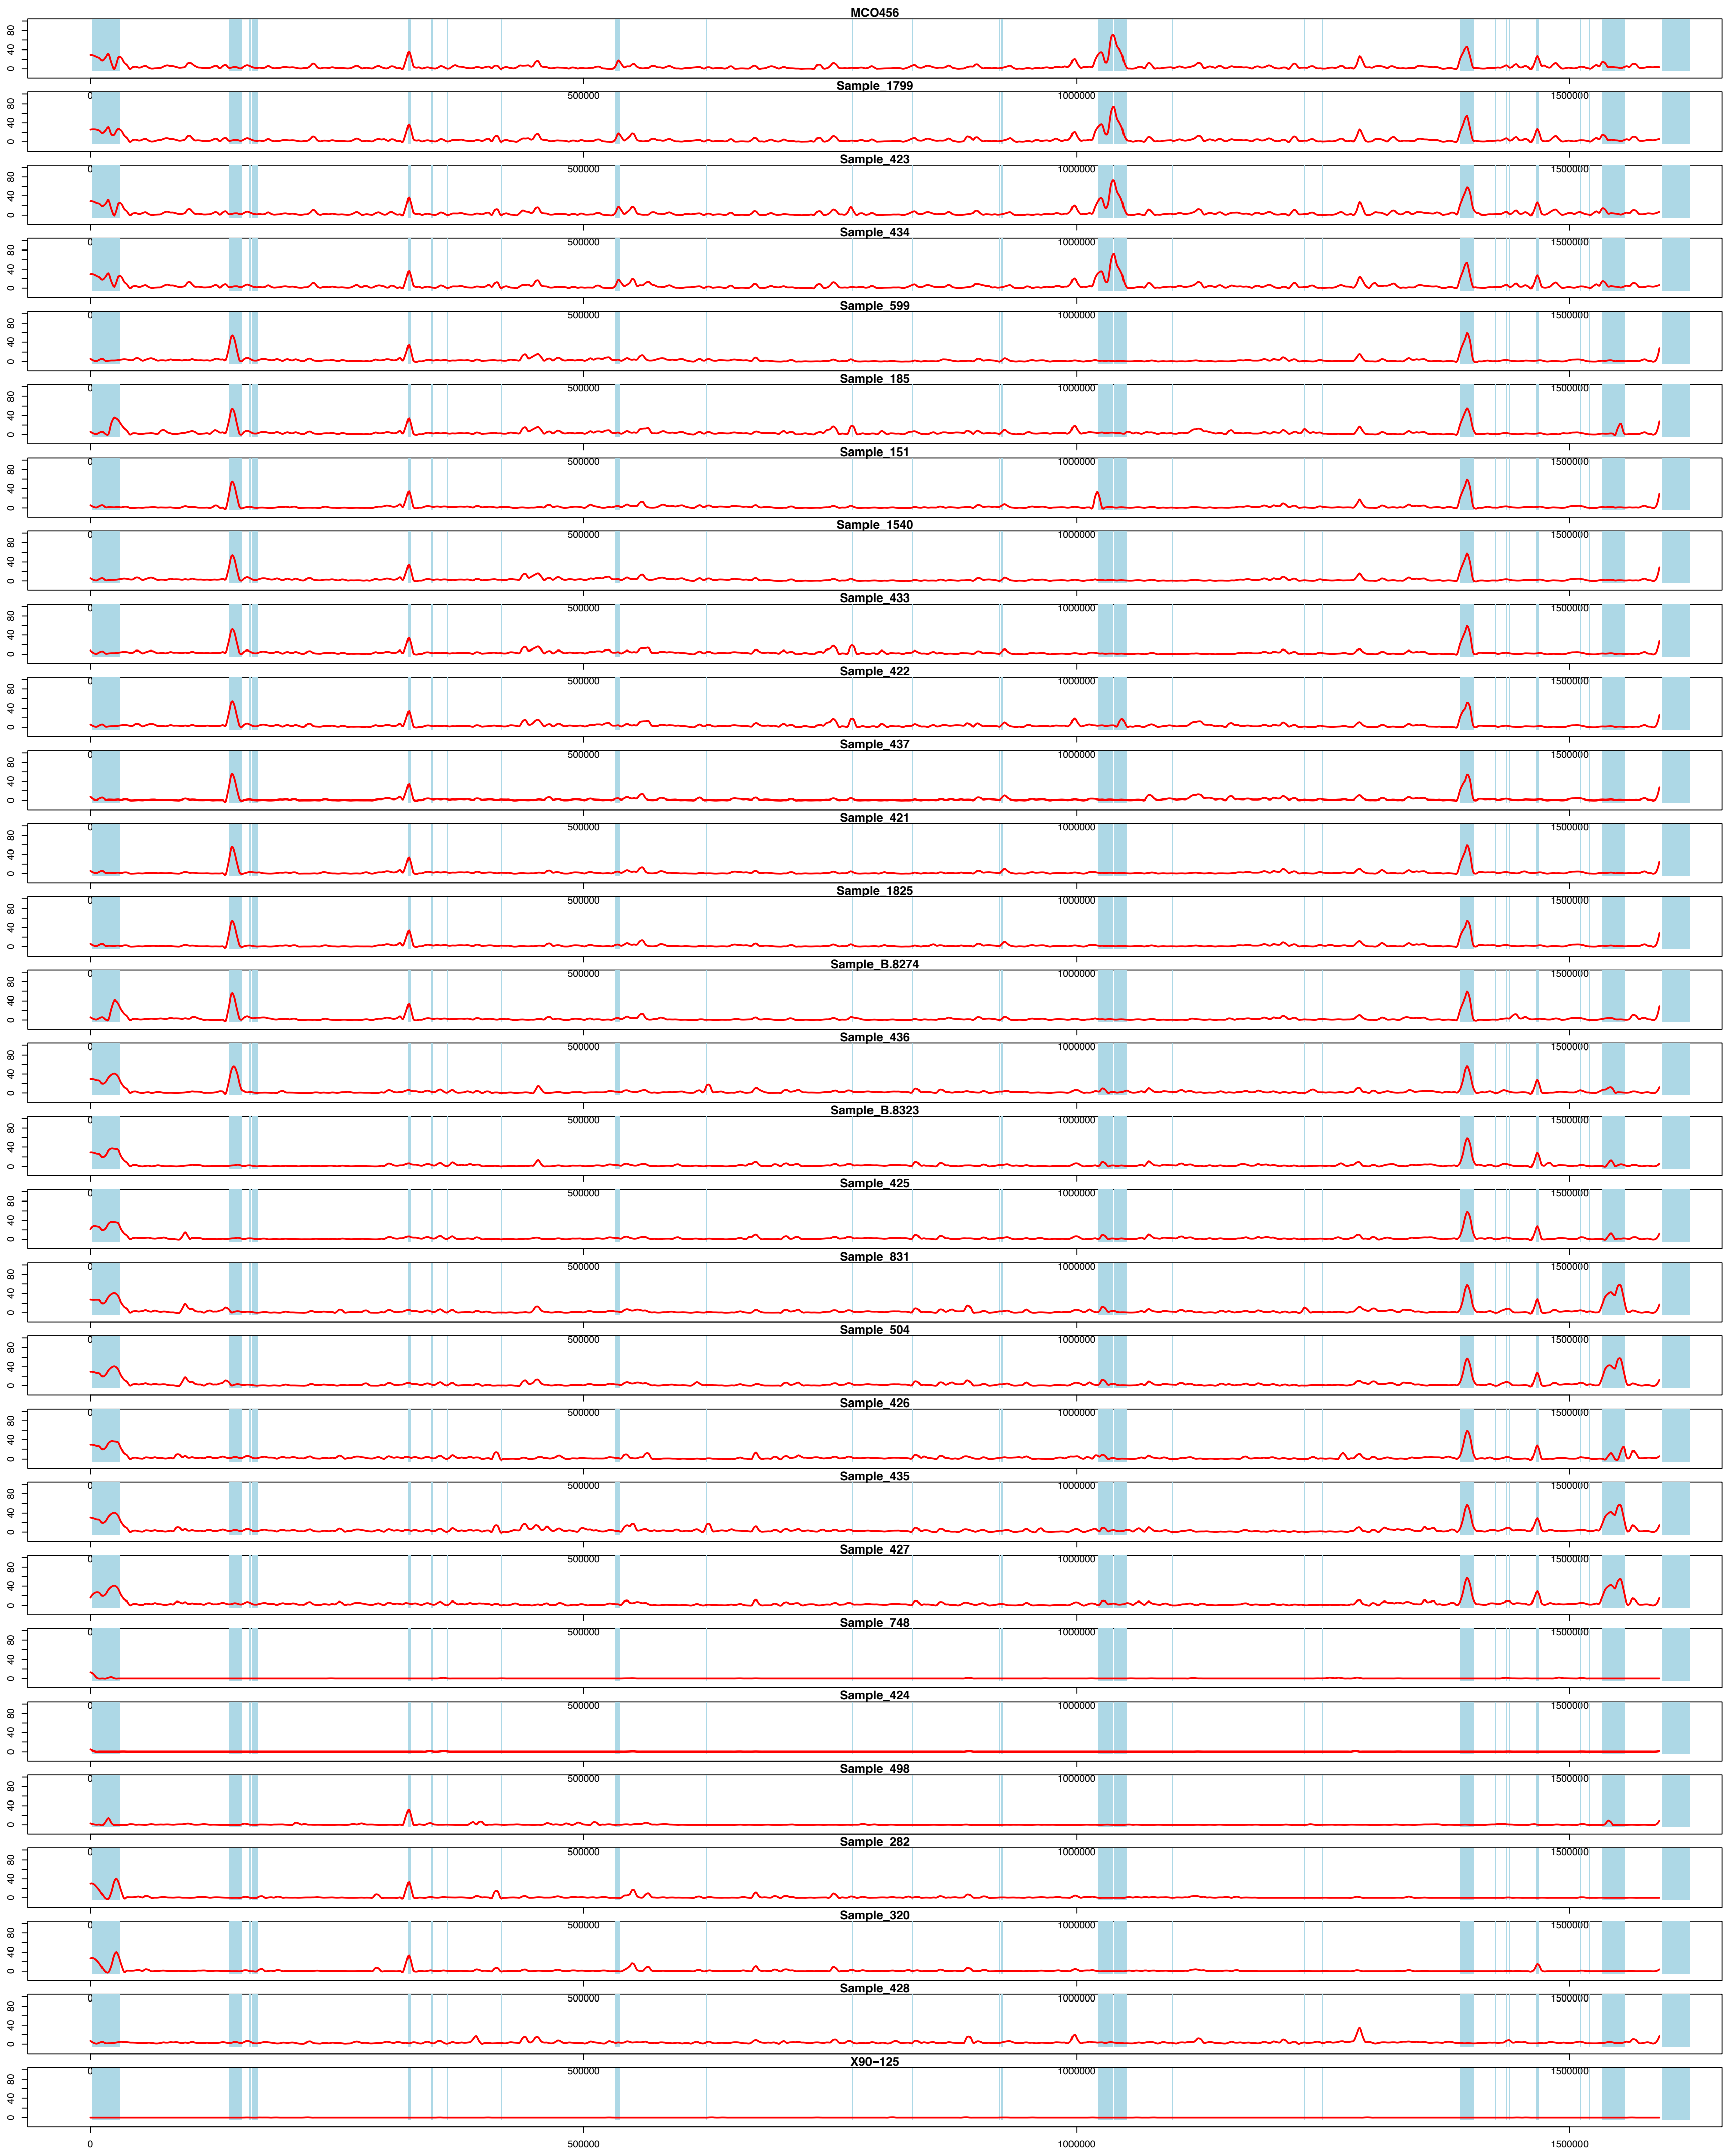

Chromosome 5

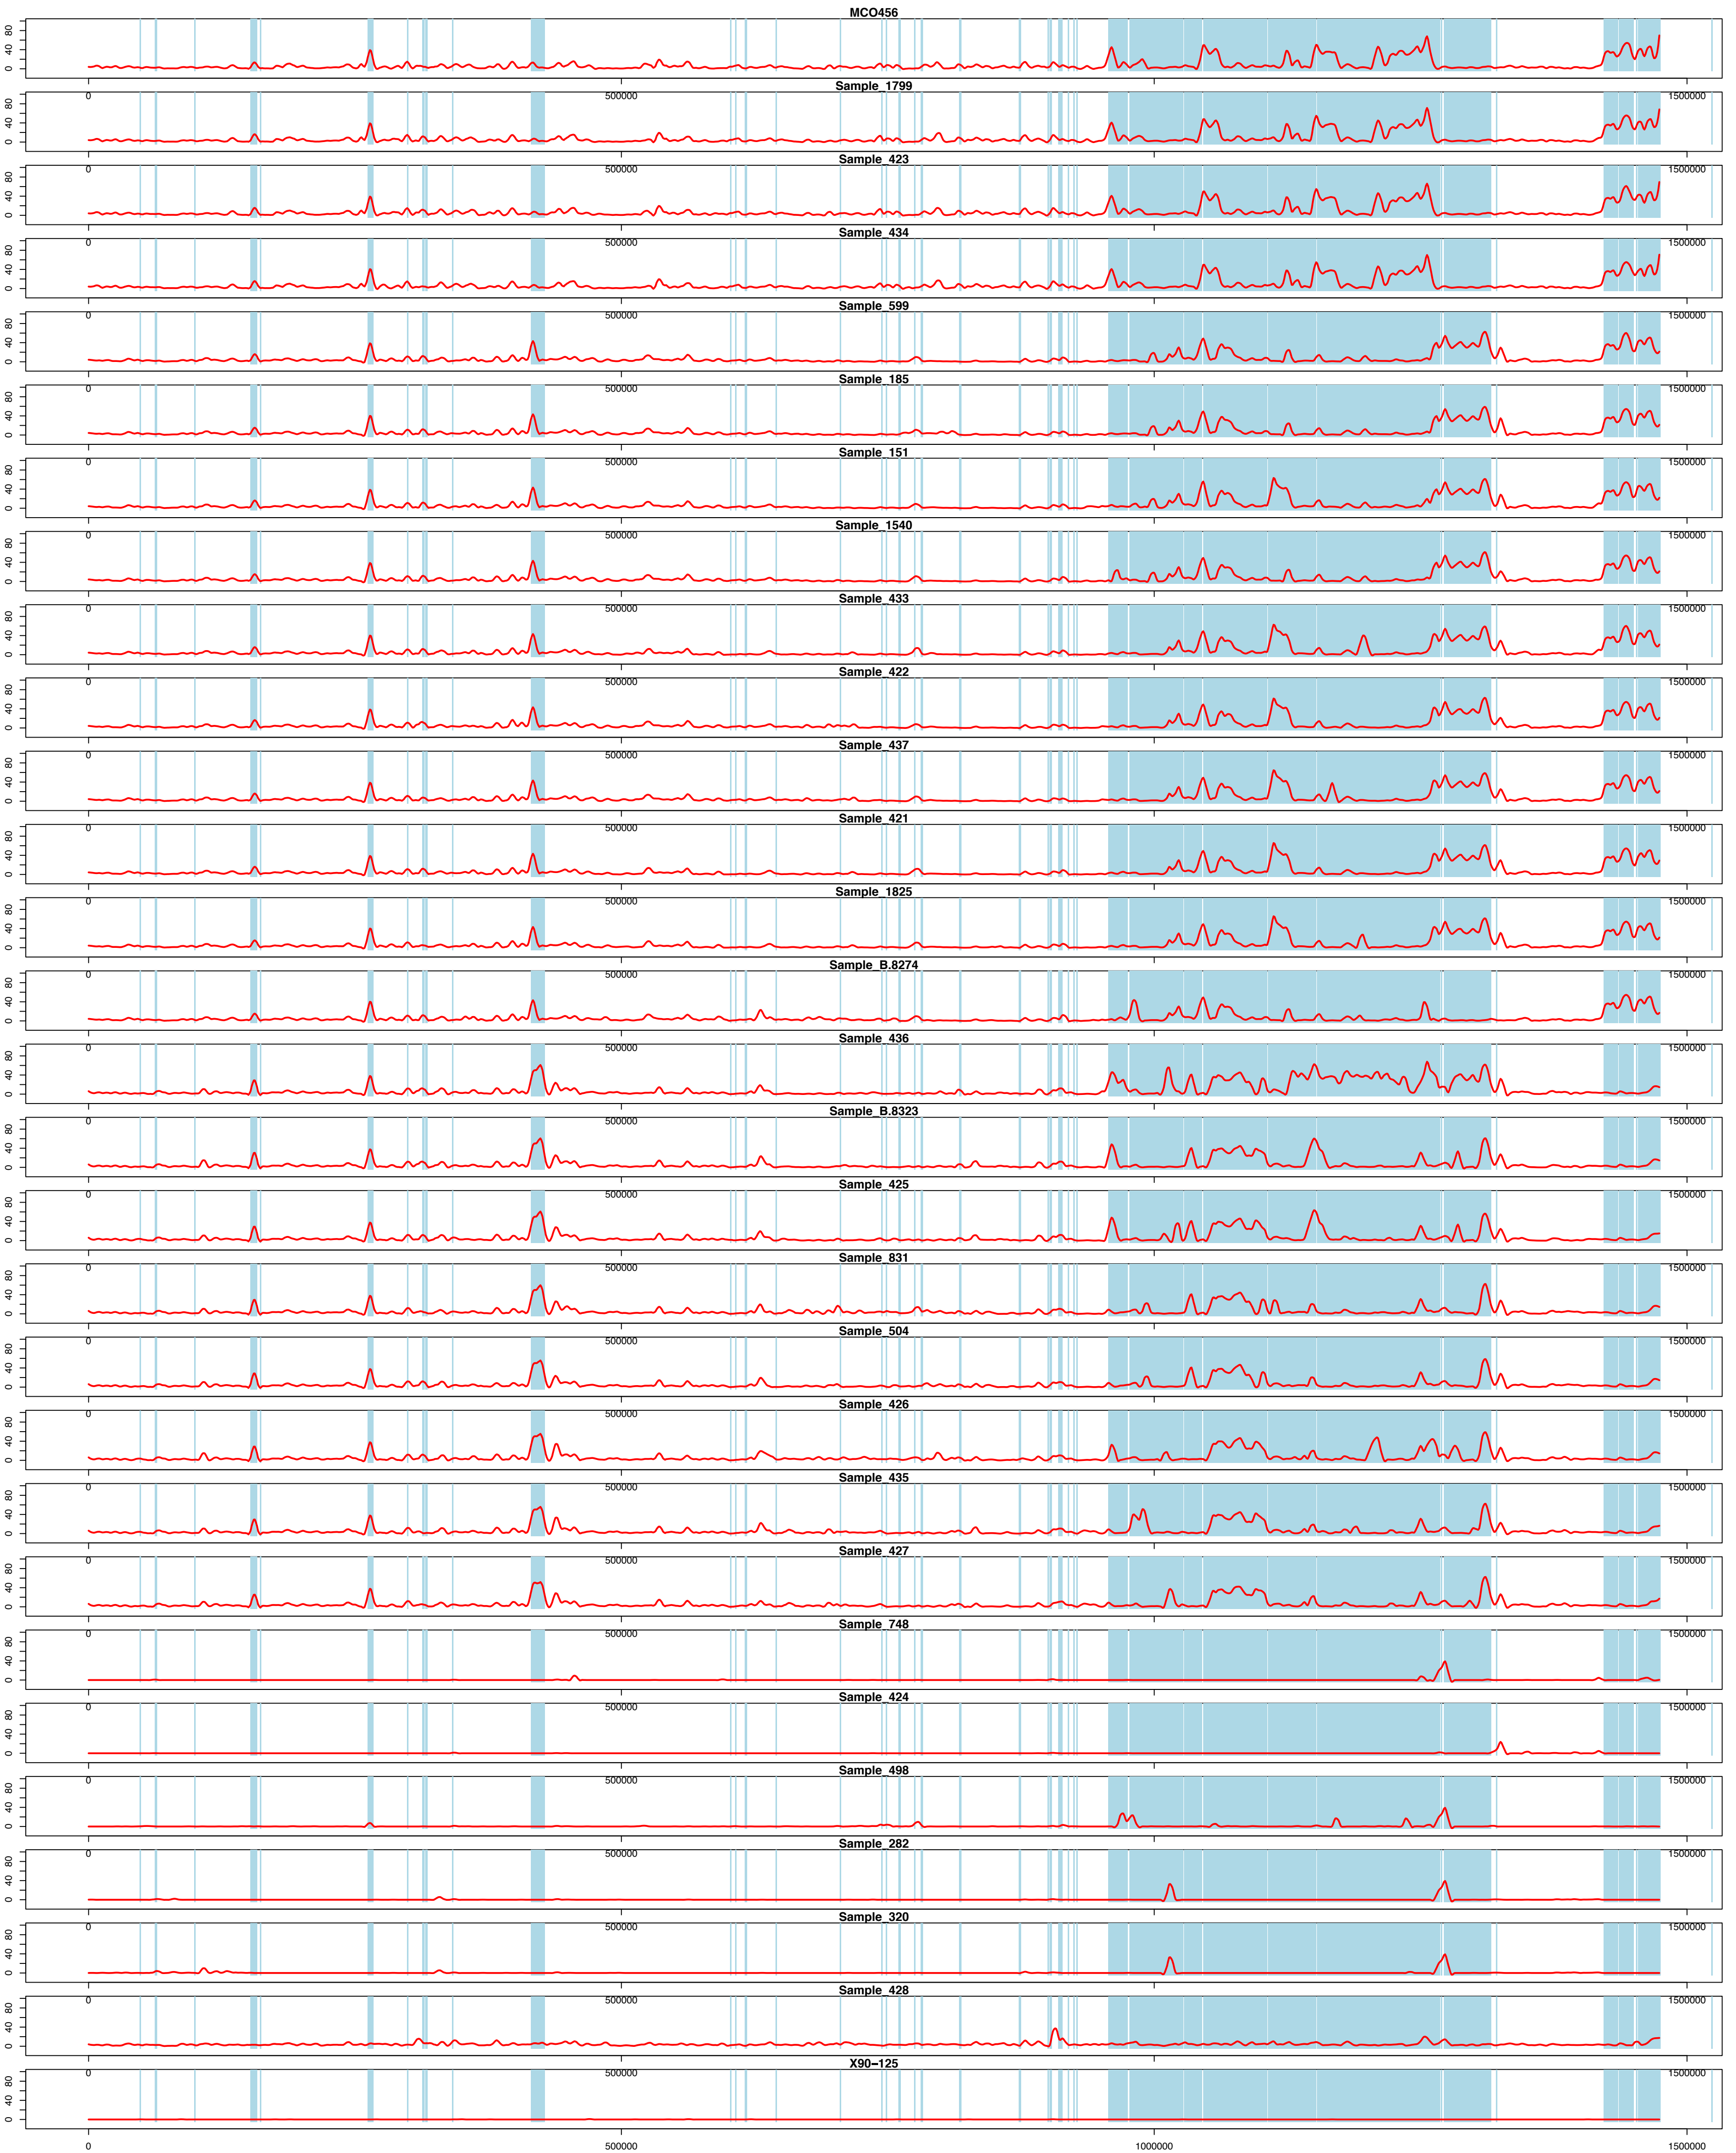

Chromosome 6

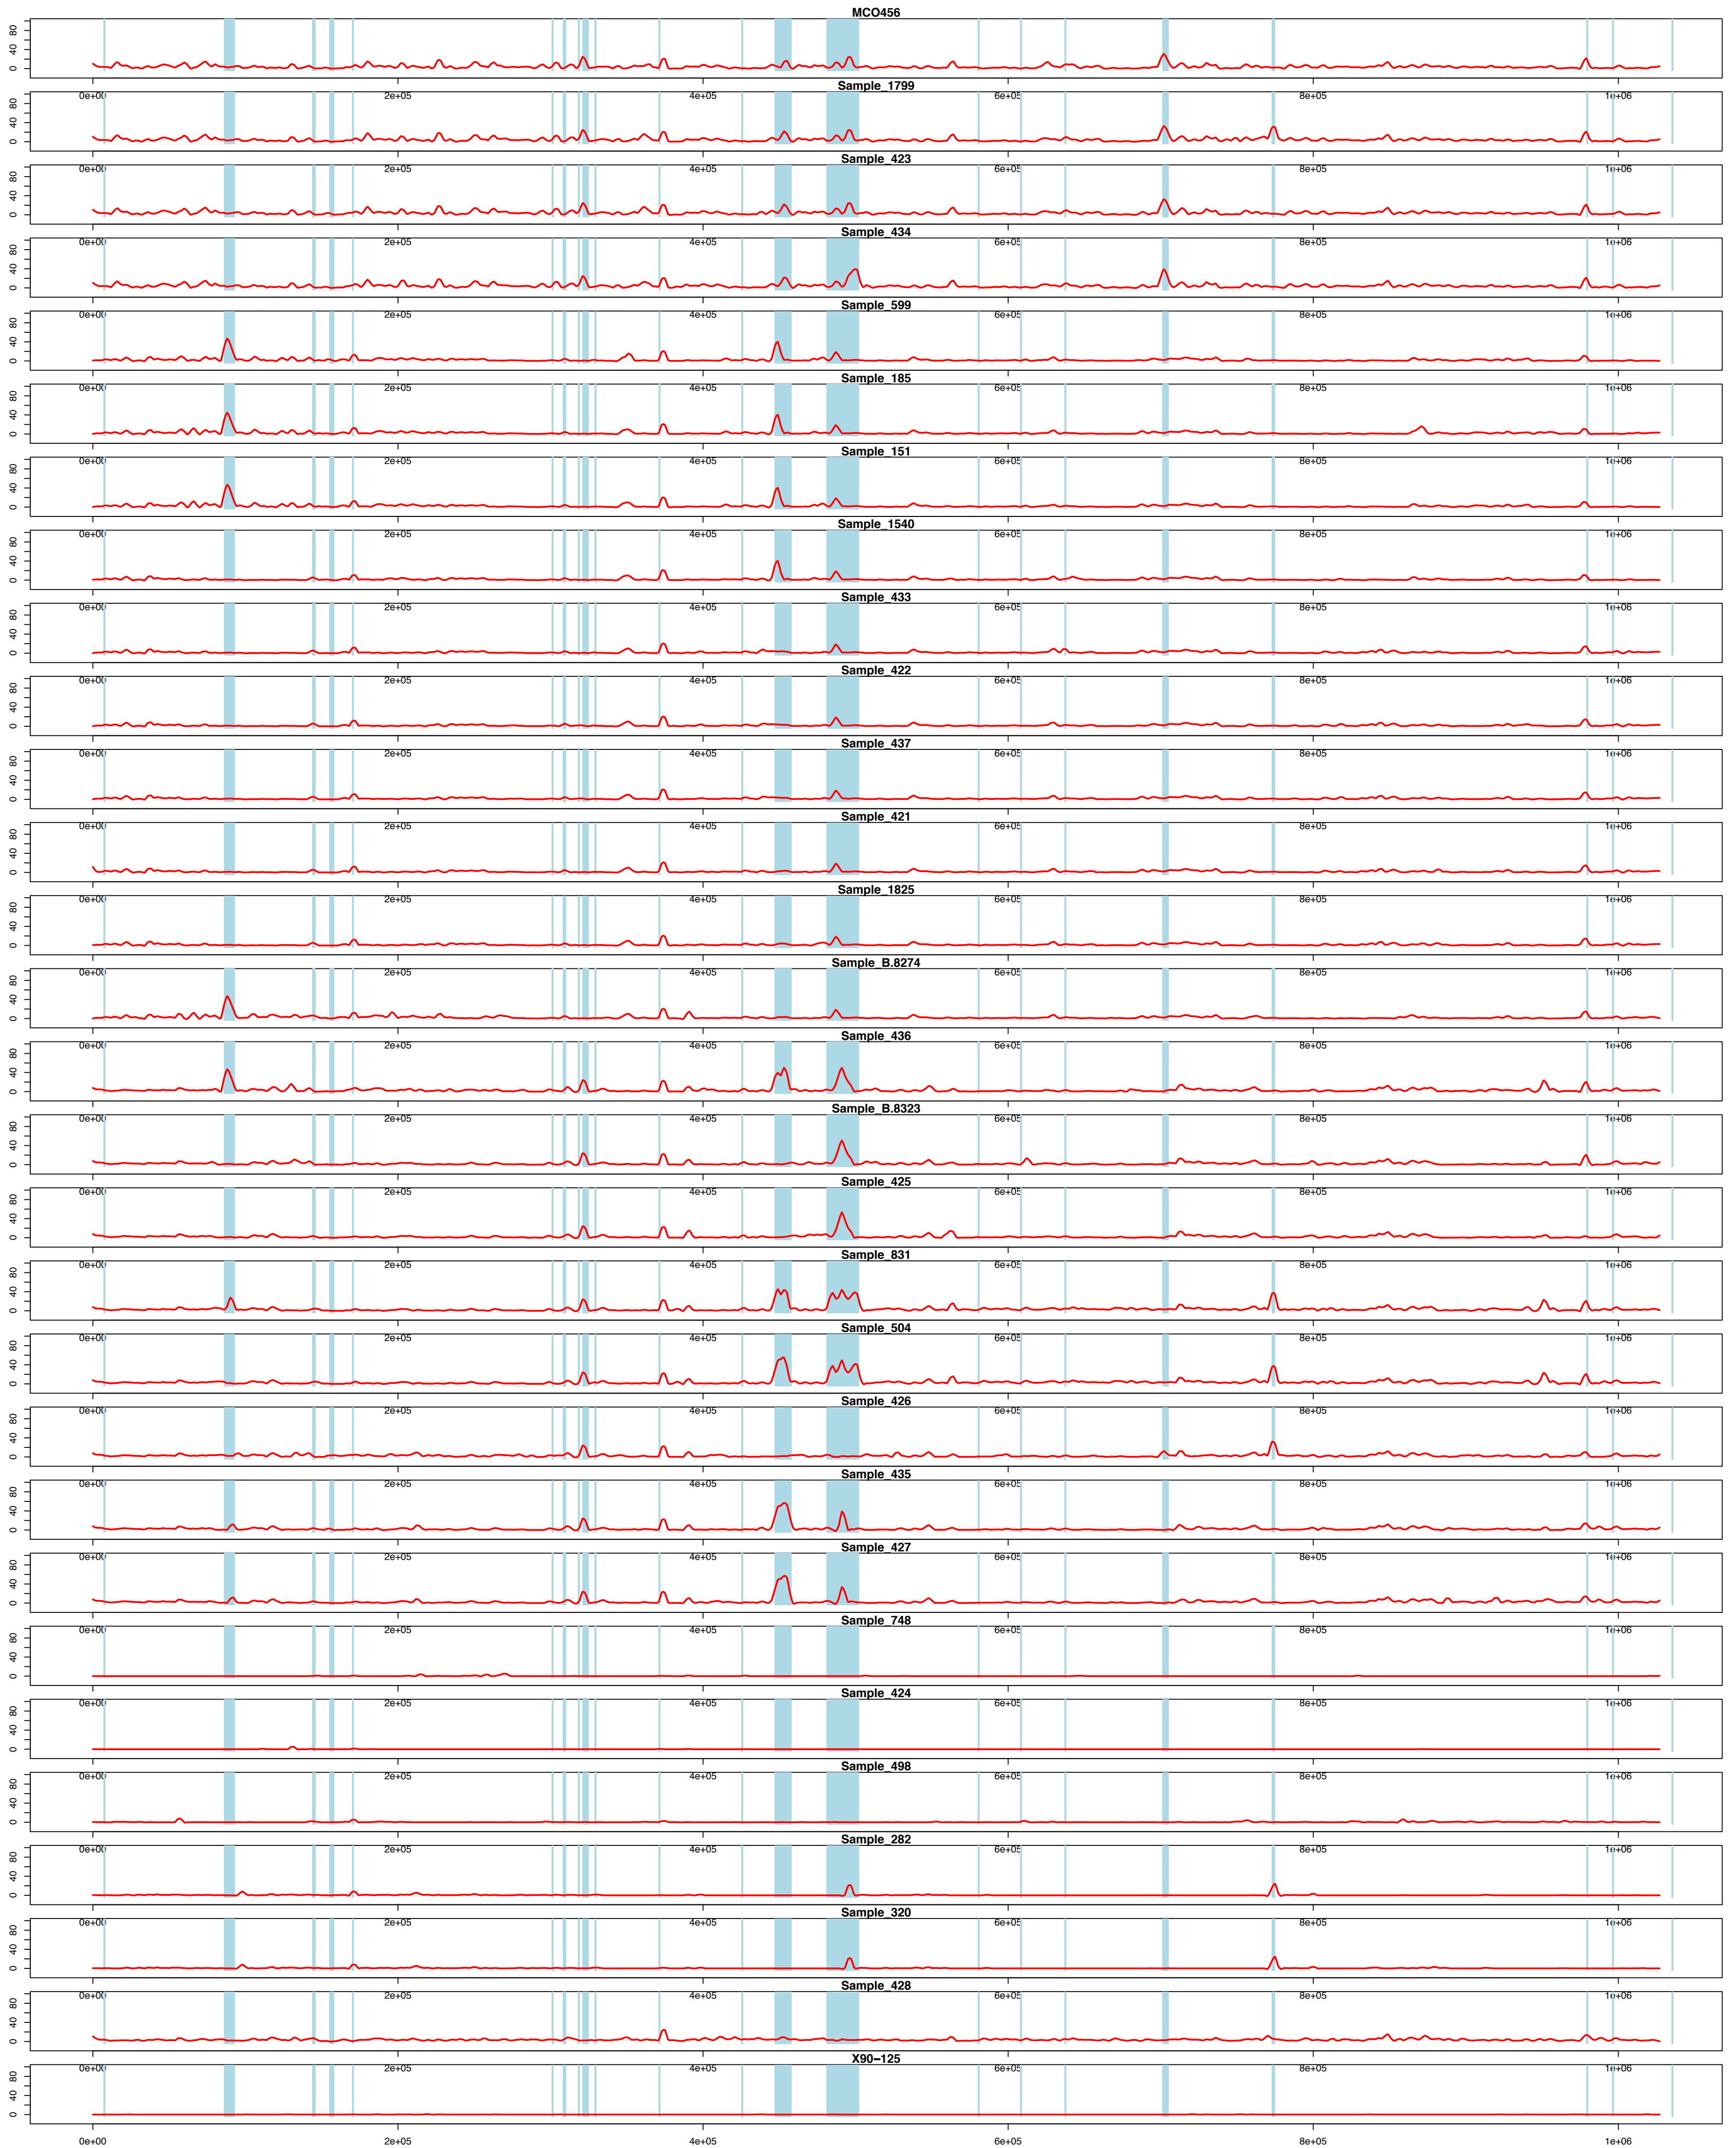



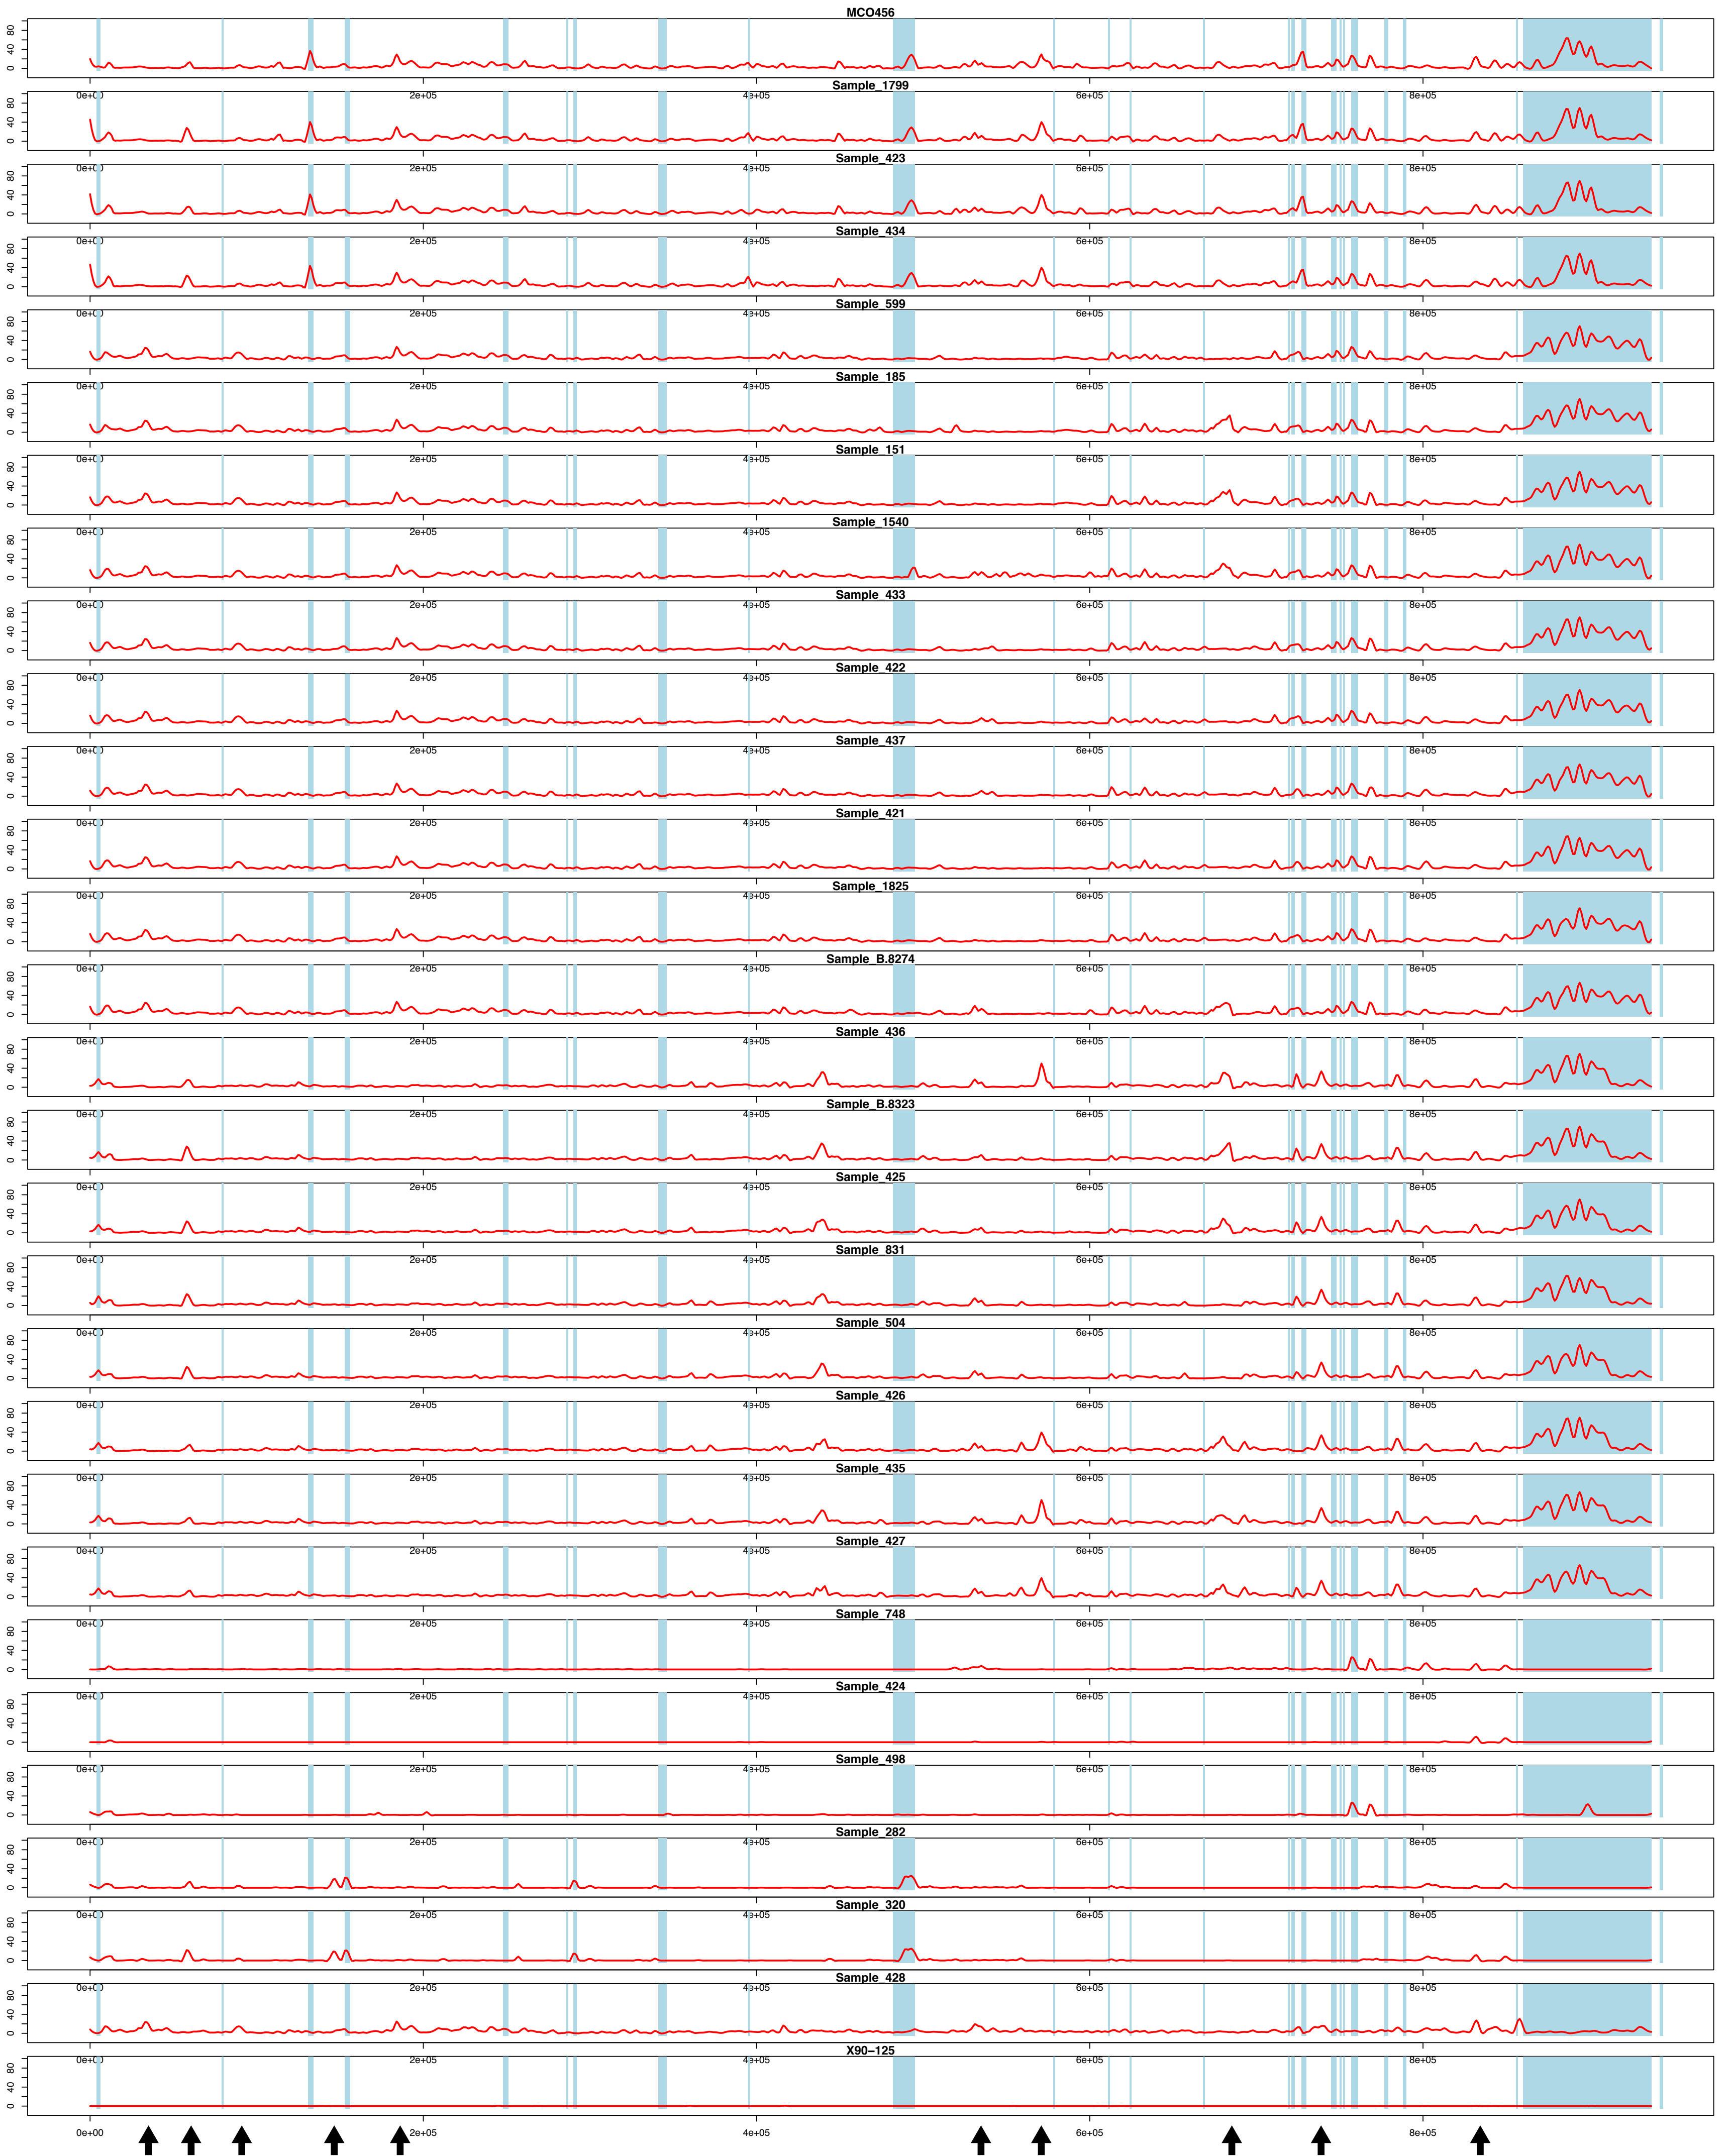

Chromosome 8

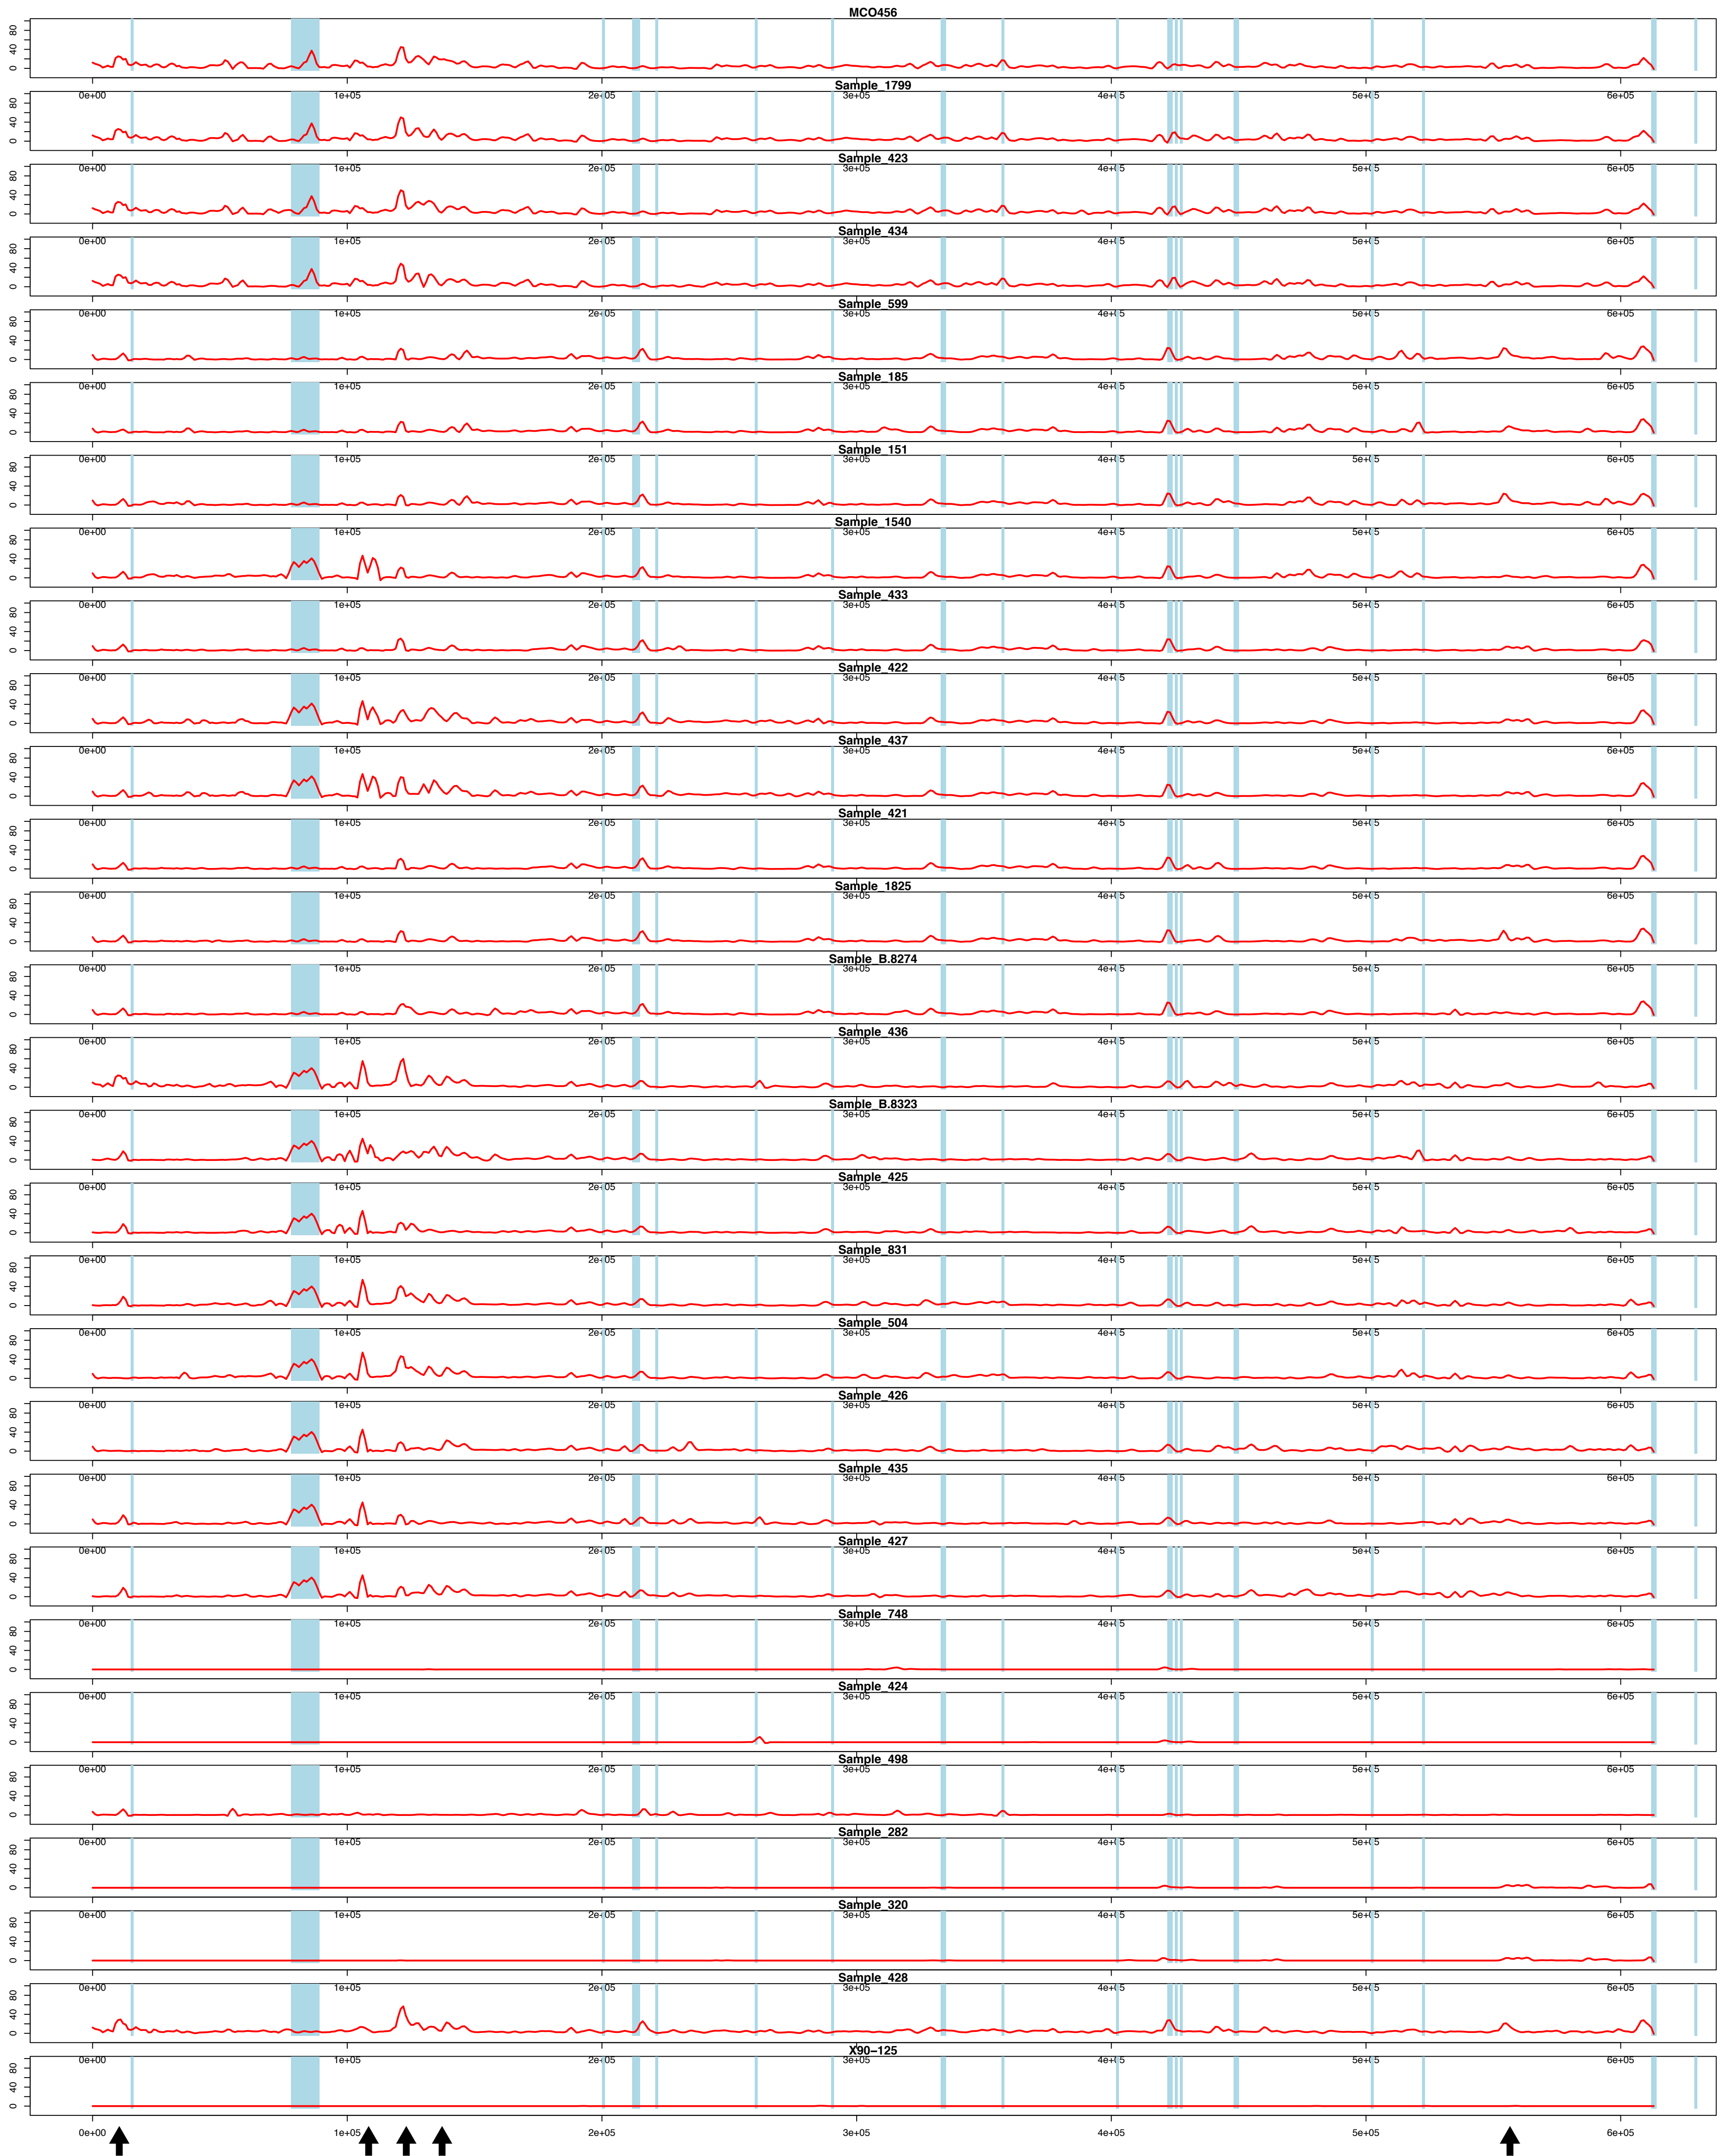

**S3 Fig.** There is no evidence of a third parental species.
