# Supplementary material for: Multiple Origins of the Pathogenic Yeast Candida orthopsilosis by Separate Hybridizations between Two Parental Species
Source: PubMed Central journal article supplement (PMC5091853; doi:10.1371/journal.pgen.1006404), 2016-11-02
Supplement: pgen.1006404.s010.pdf [file pgen.1006404.s010.pdf]

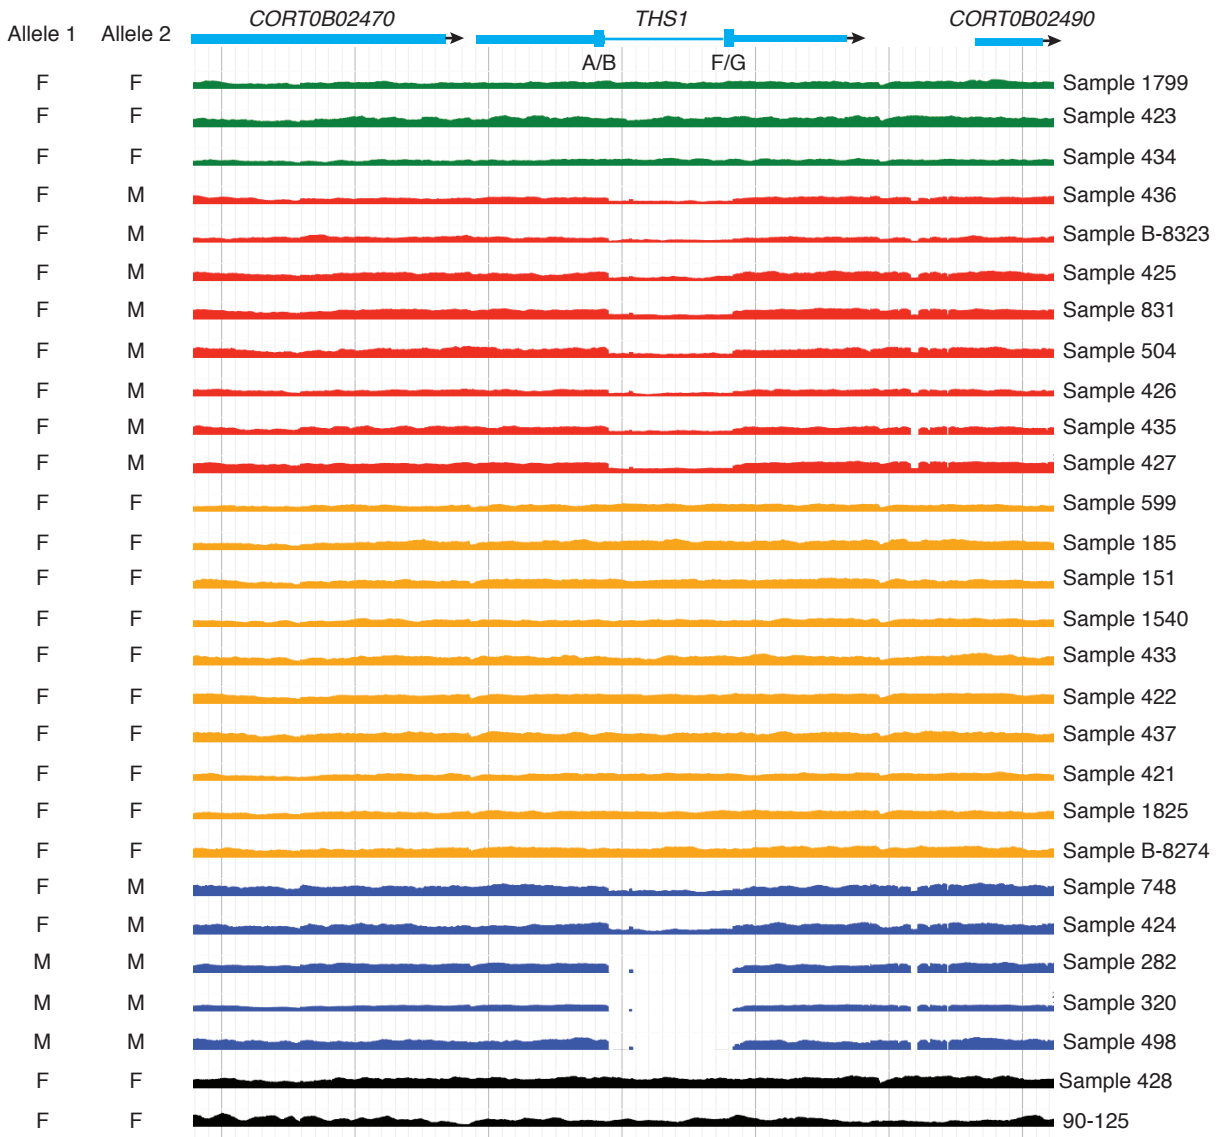

**S9 Fig.** Identification of inteins in the threonyl-tRNA synthetase gene *THS1* in *C. orthopsilosis* isolate

The wiggle plots show the read coverage (Y-axis) around the *THS1* gene (drawn to scale) for 28 *C. orthopsilosis* isolates. Clades are colored as green (Clade 1), red (Clade 2), orange (Clade 3), and blue (Clade 4). The mini intein contains only the self-splicing blocks A, B, F and G (blue boxes). The full-length intein also includes the homing domains C, D, E and H (indicated by a thin blue line in *THS1*). Each diploid isolate contains two *THS1* alleles, which may have either full-length (F) or mini (M) inteins, or are heterozygous.
